# Supplementary material
Source: publisher figshare collection journal article supplement (https://gsajournals.figshare.com/ndownloader/files/22264920)
Supplement: Supplementary file 1 [file 22264920]

Table S7: QTL found for the genotype random effects using GridLMM.
Trait	QTL	SNP PVE	QTL Marker	Chromosome	Left Bound	Right Bound
BD	BD1_1	0.019044956	m_1_26065076	1	m_1_25762752	m_1_26663272
BD	BD4_1	0.119647605	m_4_41028	4	m_4_41028	m_4_527682
BD	BD4_2	0.022333437	m_4_9240644	4	m_4_8118687	m_4_9871758
BD	BD5_1	0.057385025	m_5_3142427	5	m_5_3130900	m_5_3355249
BD	BD5_2	0.030095119	m_5_25961748	5	m_5_25852375	m_5_26182104
IG	IG1_1	0.022696524	m_1_4596540	1	m_1_4542122	m_1_4886636
IG	IG1_2	0.01570678	m_1_9434318	1	m_1_9275017	m_1_10577361
IG	IG2_1	0.018909937	m_2_11108491	2	m_2_10395643	m_2_12162694
IG	IG2_2	0.031594045	m_2_14961718	2	m_2_13993482	m_2_15310712
IG	IG4_1	0.023038808	m_4_11152111	4	m_4_11123050	m_4_11979842
IG	IG4_2	0.022102578	m_4_16217904	4	m_4_15488750	m_4_16640333
IG	IG5_1	0.051323023	m_5_4647184	5	m_5_3799350	m_5_5130837
IG	IG5_2	0.012466133	m_5_17201959	5	m_5_17185569	m_5_17386178
IB	IB4_1	0.043521078	m_4_41028	4	m_4_41028	m_4_527682
IB	IB5_1	0.049455228	m_5_3811043	5	m_5_3799350	m_5_4647184
RB	RB4_1	0.079041516	m_4_41028	4	m_4_41028	m_4_527682
RB	RB4_2	0.026097094	m_4_8938713	4	m_4_8504098	m_4_9412679
RB	RB4_3	0.01937187	m_4_15965258	4	m_4_15280472	m_4_16532462
RB	RB5_1	0.042257997	m_5_3475211	5	m_5_3130900	m_5_3811043
RB	RB5_2	0.024834556	m_5_25961748	5	m_5_25852375	m_5_26182104
SNP PVE, percent variance explained for the QTL; Left Bound, left marker of the 95% confidence interval; Right Bound, right marker of the 95% confidence interval. BD, bolting days; IG, inflorescence growth; RB, dry rosette biomass; IB, dry inflorescence biomass.
